# Supplementary material
Source: PubMed Central journal article supplement (PMC5737665)
Supplement: NIHMS924938-supplement-jneaa80bd_Supplementary_figure_pdf.pdf [file NIHMS924938-supplement-jneaa80bd_Supplementary_figure_pdf.pdf]

# Fraction of Channels

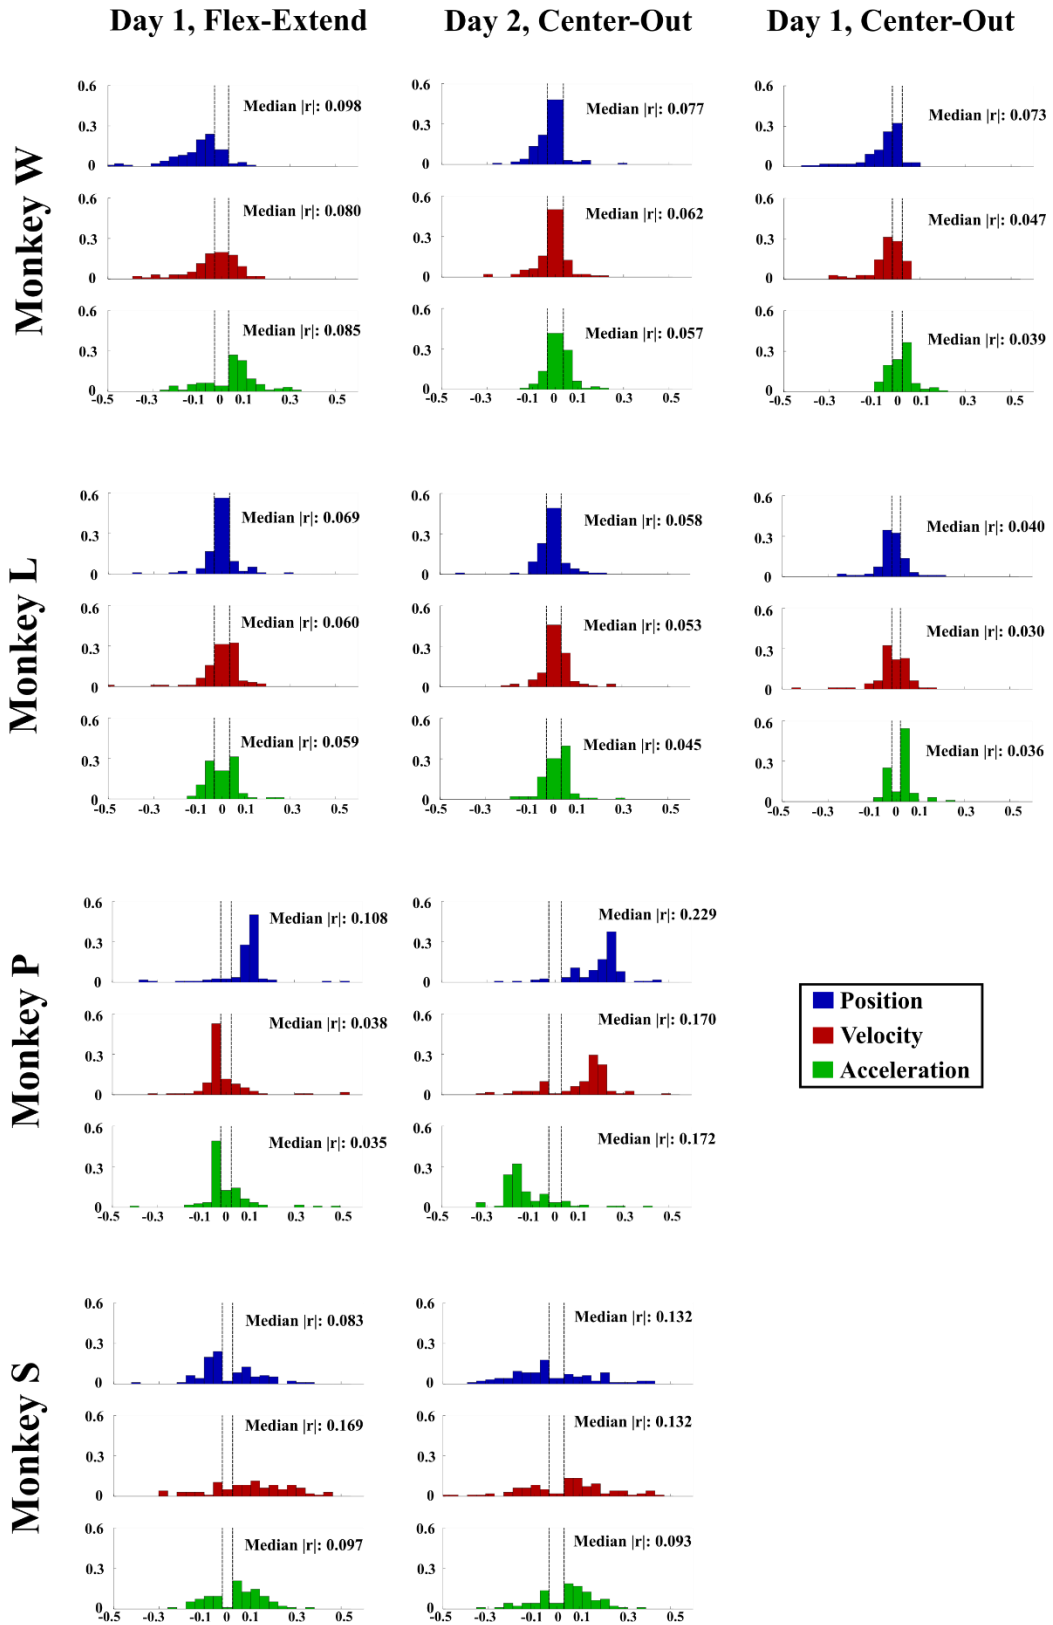

**Figure S1.** Comparison of neural tuning across days (Day 1 and Day 2) and tasks (*flex-extend* and *center-out*). Presented as histograms of single-neuron correlation coefficients with each kinematic parameter (position, velocity, and acceleration) within each monkey. In all cases except Monkey S, position remained the best-represented parameter (even in Monkey S, position became tied with velocity on the second day). For Monkeys L and W, tuning changed more between tasks compared to between days. All monkeys further displayed unique tuning patterns even when performing the same task, suggesting that these differences are intrinsic to the monkey rather than being related solely to the task.
